# Supplementary material for: Comparison of responses to rapid changes in salinity between Hippocampus kuda and Oryzias melastigma
Source: Research Square preprint supplement (doi:10.21203/rs.3.rs-6537500/v1), 2025-06-17
Supplement: Supplementary file 1 [file 350990b01f1c5c986198a1db.docx]

Table 1 Their names and primer sequences of 8 genes analyzed in the experiment

|  | Seahorse | Marine madaka |
| --- | --- | --- |
| Gene name | Primer sequences（5'-3'） | Primer sequences（5'-3'） |
| *Sod1* | F: TCACATACTTCACGGGTTTCG  R: AGGGAAATGTTCAAGGTACTGC | F:CAAATGGGTGTACCAGTGCG  R:ATCTCATCATCTCCTGCGGTC |
| *Hsp70* | F: GTCGGTGAAATAACAGGGAACA  R: CTCTGGGTCTACAGGTATTAAGGTG | F: ATCAGGAGACACCCACCTCG  R: GCCCTCTTGTTCTGGCTAATGT |
| *Ldha* | F: TTGCCCGTCATCTTCATCTG  R: GACATCCATACCATCCACCCT | F:TCGCTGTGGAAAGGCTCTAA  R:CTCTTCTGGGCTGAAGTAAACG |
| *Mdh1* | F: TCTGCGACCACATGAGGGA  R: TCTGGACGGGGAAGGAGTAG | F:GCCGCTCAGAAGCTATTTGC  R:GCCTCCTGTCCTCTAGTAGCA |
| *Cpt1* | F: TCAGGGCCAGACGATGCTT  R: CGACCGTGCTGCTCAAACA | F:ACCGACGCCATTCCCATA  R:CTGTCCAGAACCTCCACATACC |
| *Fasn* | F: GTCCCATTGTGCTGTTGTGAC  R: CGGACTCCTGAATATCCAGCC | F:TGCCACTCCTCCATCTTTGA  R:ACGGTTGCTGTAGCCGAAC |
| *P53* | F: CTTCATCTCATTTCCCAGCATCT  R: GGCTTCTAAACCCCACCCTCT | F:GCCTTGAAAAGTCTCCATCTGC  R:TTCTTCCTCCGTTTTGCGGT |
| *Casp3* | F: GGGACGGATGTTGATGCTG  R: TGGTCCTCTTGGGATACACTCA | F: TCTTGTGGGGAAACCAAAGC  R: ATAGCCTGAAACGGTGGAGTAG |
| *b2m / actb* | F: TACACCCACCAGCCAGGAAA  R: GGACTCGACGACATCGAACATC | F:CCCAAAGCCAACAGGGAGA  R:CAGAGGCATACAGGGACAGCA |

Table 2 Effects of different rates of salinity changes on the RNA/DNA ratio in the experiment

| Treatment | Sampling time | CK | 5H±2 | 2H±2 | 0H±2 |
| --- | --- | --- | --- | --- | --- |
| **（-2ppt）** |  |  |  |  |  |
| seahorse | 4d | 2.849±0.250b | 2.774±0.134b | 2.681±0.259b | 2.259±0.284a |
|  | 7d | 2.626±0.249b | 2.573±0.095b | 2.345±0.177a | 2.163±0.135a |
| madaka | 4d | 2.237±0.283a | 2.054±0.226a | 2.215±0.164a | 1.904±0.250a |
|  | 7d | 2.585±0.231a | 2.521±0.354a | 2.233±0.379a | 2.296±0.145a |
| **（+2ppt）** |  |  |  |  |  |
| seahorse | 4d | 2.849±0.250b | 2.712±0.346ab | 2.531±0.193ab | 2.427±0.289a |
|  | 7d | 2.626±0.329b | 2.483±0.288ab | 2.211±0.165ac | 2.058±0.232c* |
| madaka | 4d | 2.372±0.283a | 2.542±0.252a | 2.445±0.276a | 2.219±0.134a |
|  | 7d | 2.585±0.231a | 2.716±0.350a | 2.503±0.158a | 2.427±0.271a |

**Note: Different lowercase letters indicated significant differences in the same species among different rate groups (P<0.05), * indicated there was a significant difference (P<0.05) between the 4d and 7d of the same species.**
